# Supplementary material for: A highly selective PET-based chemosensor for instant detecting of Zn2+
Source: Royal Society of Chemistry journal article supplement (doi:10.1039/c4ra04130e), 2014-08-18
Supplement: c4ra04130e1.pdf [file c4ra04130e1.pdf]

*Supporting information for:*

## **A Highly Selective PET-Based Chemosensor for Instant Detecting Zn<sup>2+</sup>**

Jie Guan, Peng Zhang, Tai-bao Wei, Qi Lin, Hong Yao and You-ming Zhang\*

-----  
E-mail: zhangnwnu@126.com<sup>1</sup>  
-----

*Key Laboratory of Eco-Environment-Related Polymer Materials, Ministry of Education of  
China, Key Laboratory of Polymer Materials of Gansu Province, College of Chemistry and  
Chemical Engineering, Northwest Normal University, Lanzhou, Gansu 730070, PR China*

### **Supporting Information List of Figures:**

**Figure S1.** Plot of the UV-vis absorption at 423 nm for a mixture of **L2** (20 μM) upon adding of an increasing concentration of Zn<sup>2+</sup> in DMSO/H<sub>2</sub>O (8:2, v/v, containing 0.01 M HEPES, pH=7.24).

**Figure S2.** The Job's plot examined between Zn<sup>2+</sup> and **L2**, indicating the 1: 1 stoichiometry, which was carried out by UV-vis spectra.

**Figure S3.** Fluorescence spectra response of **L2** (20 μM) upon addition of Zn<sup>2+</sup> (20 equiv.) in DMSO/H<sub>2</sub>O (8:2, v/v, containing 0.01 M HEPES, pH=7.24), (λ<sub>ex</sub>=423 nm). Inset: Photograph of **L2** (20 μM) upon adding 20 equiv. of Zn<sup>2+</sup>, which was taken under a UV-lamp (365 nm).

**Figure S4.** Plot of the intensity at 508 nm for a mixture of **L2** (20 μM) upon adding of an increasing concentration of Zn<sup>2+</sup> in DMSO/H<sub>2</sub>O (8:2, v/v, containing 0.01 M HEPES, pH=7.24),

---

\* Corresponding author. Tel.: +86-931-797-3120; fax: +86-931-797-3120; e-mail: zhangnwnu@126.com

---

( $\lambda_{\text{ex}}=423$  nm).

**Figure S5.** ESI-MS spectra of **L2**.

**Figure S6.** ESI-MS spectra of **L2-Zn<sup>2+</sup>**.

**Figure S7.** ESI-MS spectra of **L2-Zn<sup>2+</sup>** upon addition of **Cu<sup>2+</sup>**.

**Figure S8.** FT-IR spectra of **L2** (the black line) and **L2-Zn<sup>2+</sup>** (the red line).

**Figure S9.** Fluorescence spectra of **L2-Zn<sup>2+</sup>** (20  $\mu\text{M}$ ) in the presence of **Cu<sup>2+</sup>** or **Cu<sup>2+</sup>** and **S<sup>2-</sup>** in DMSO/H<sub>2</sub>O (8:2, v/v, containing 0.01 M HEPES, pH=7.24), ( $\lambda_{\text{ex}}=423$  nm).

**Figure S10.** <sup>1</sup>H NMR spectra of **L2**.

**Figure S11.** <sup>13</sup>C NMR spectra of **L2**.

Figure S1

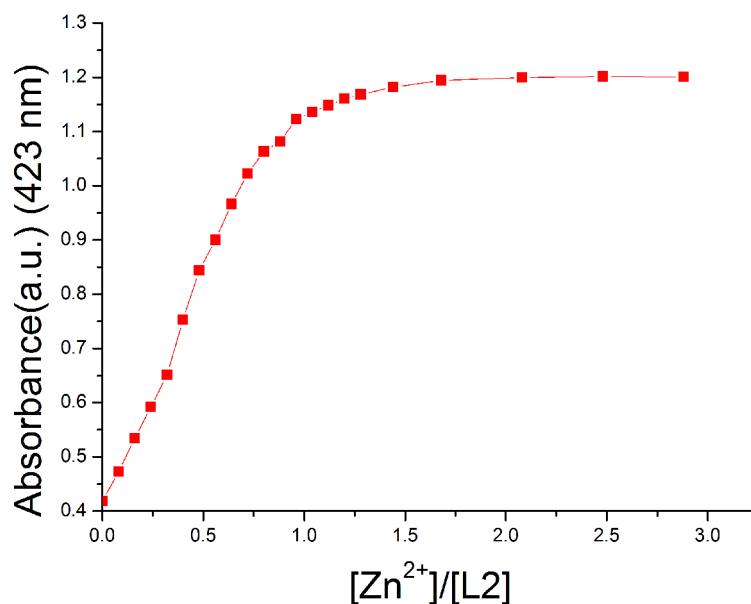

---

**Figure S1.** Plot of the UV-vis absorption at 423 nm for a mixture of **L2** (20  $\mu\text{M}$ ) upon adding of an increasing concentration of  $\text{Zn}^{2+}$  in DMSO/ $\text{H}_2\text{O}$  (8:2, v/v, containing 0.01 M HEPES, pH=7.24).

Figure S2

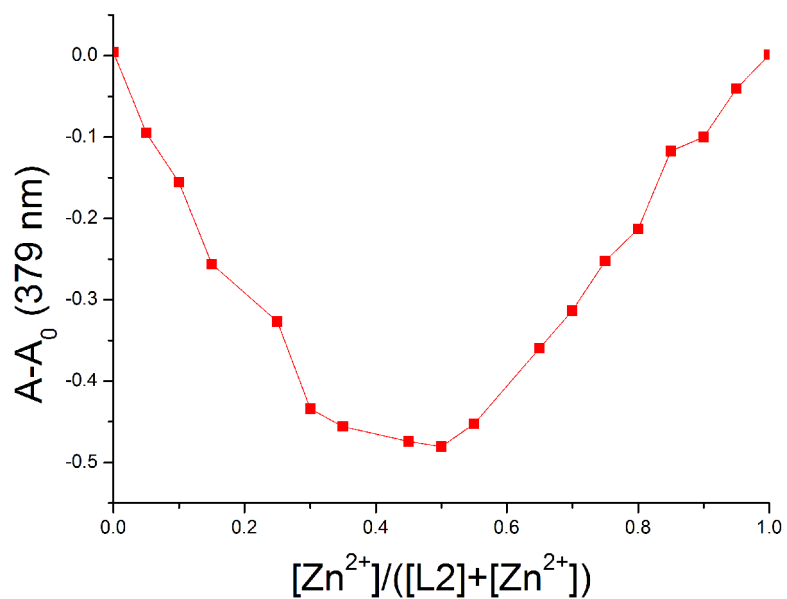

**Figure S2.** The Job's plot examined between  $\text{Zn}^{2+}$  and **L2**, indicating the 1: 1 stoichiometry, which was carried out by UV-vis spectra.

Figure S3

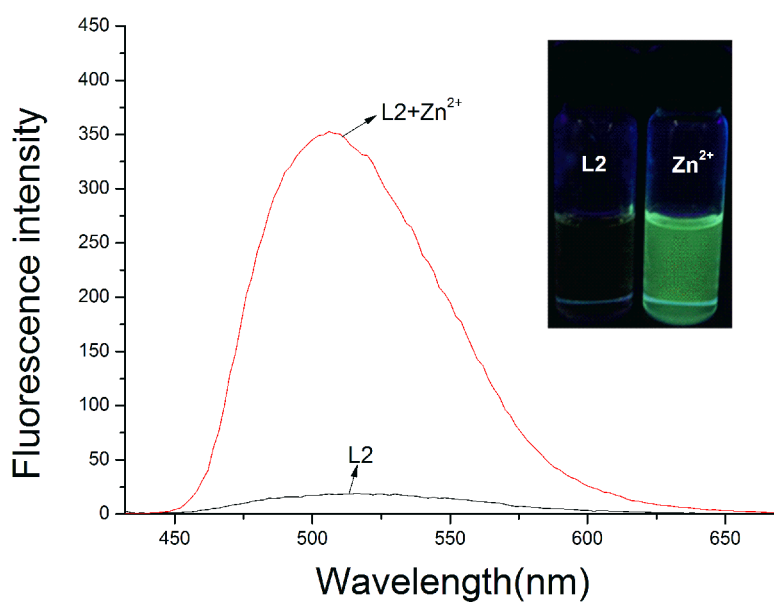

**Figure S3.** Fluorescence spectra response of **L2** (20  $\mu\text{M}$ ) upon addition of  $\text{Zn}^{2+}$  (20 equiv.) in DMSO/ $\text{H}_2\text{O}$  (8:2, v/v, containing 0.01 M HEPES, pH=7.24), ( $\lambda_{\text{ex}}$ =423 nm). Inset: Photograph of **L2** (20  $\mu\text{M}$ ) upon adding 20 equiv. of  $\text{Zn}^{2+}$ , which was taken under a UV-lamp (365 nm).

Figure S4

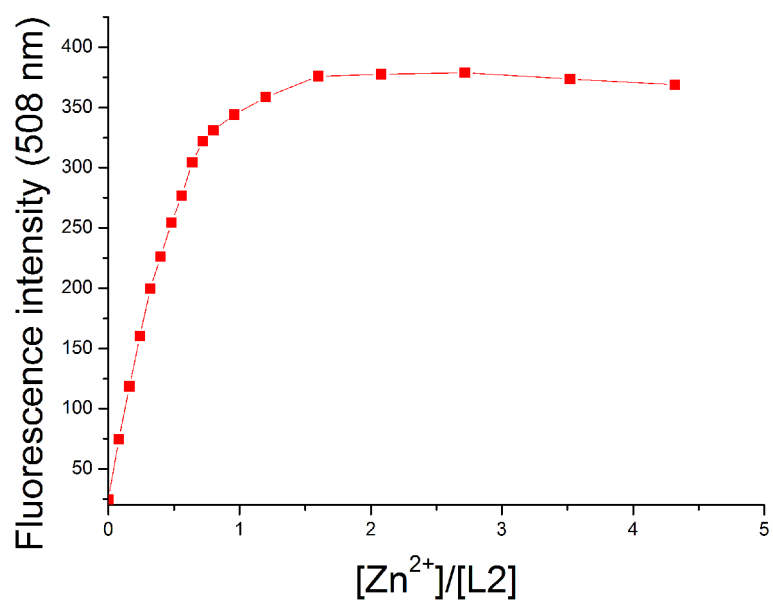

**Figure S4.** Plot of the intensity at 508 nm for a mixture of **L2** (20  $\mu\text{M}$ ) upon adding of an increasing concentration of  $\text{Zn}^{2+}$  in DMSO/ $\text{H}_2\text{O}$  (8:2, v/v, containing 0.01 M HEPES, pH=7.24), ( $\lambda_{\text{ex}}$ =423 nm).

Figure S5

## Generic Display Report

### Analysis Info

Analysis Name D:\Data\YANGY\New\ZHANGPENG140303\_2.d  
Method tune\_wide\_20130705.m  
Sample Name DEFAULT  
Comment

Acquisition Date 3/3/2014 3:22:38 PM

Operator BDAL@DE  
Instrument micrOTOF

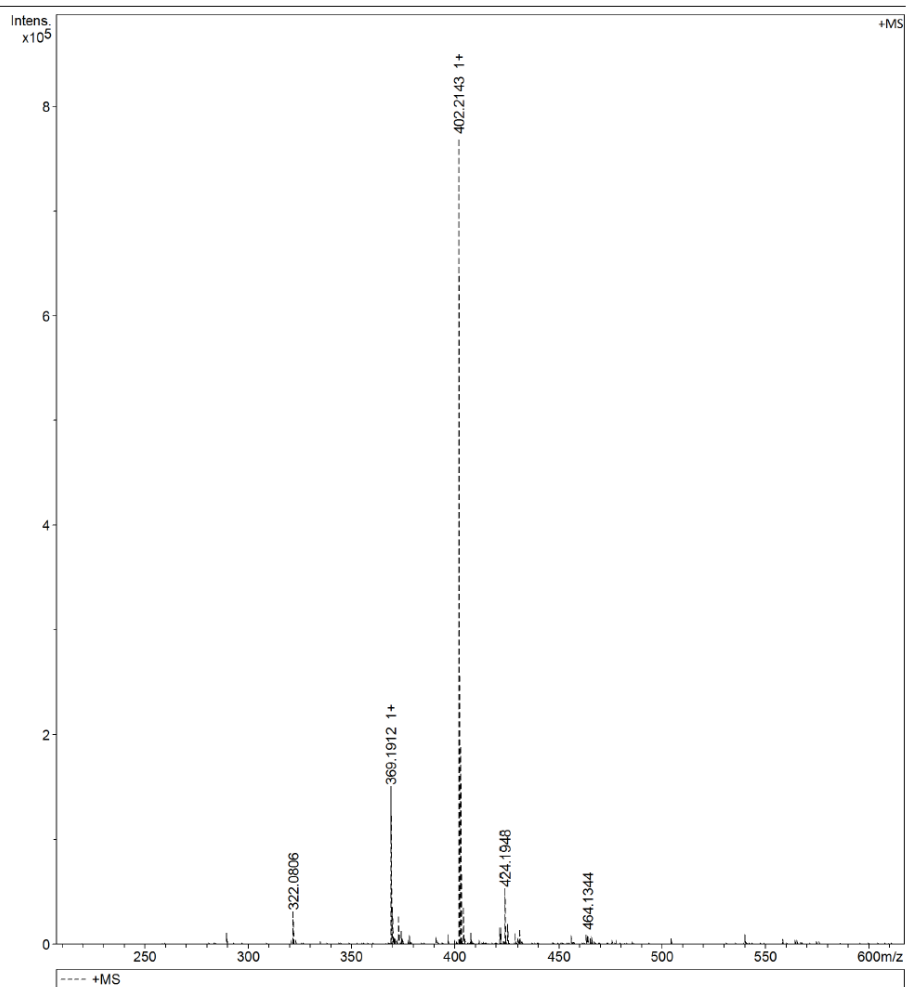

Bruker Compass DataAnalysis 4.1

printed: 3/3/2014 3:32:27 PM

by: BDAL@DE

Page 1 of 1

**Figure S5.** ESI-MS spectra of L2.

Figure S6

## Generic Display Report

|                      |                                          |                  |                     |
|----------------------|------------------------------------------|------------------|---------------------|
| <b>Analysis Info</b> |                                          | Acquisition Date | 3/3/2014 4:11:16 PM |
| Analysis Name        | D:\Data\YANGY\New\ZHANGPENG140303_3ESI.d | Operator         | BDAL@DE             |
| Method               | tune_high_20130705.m                     | Instrument       | microTOF            |
| Sample Name          | DEFAULT                                  |                  |                     |
| Comment              |                                          |                  |                     |

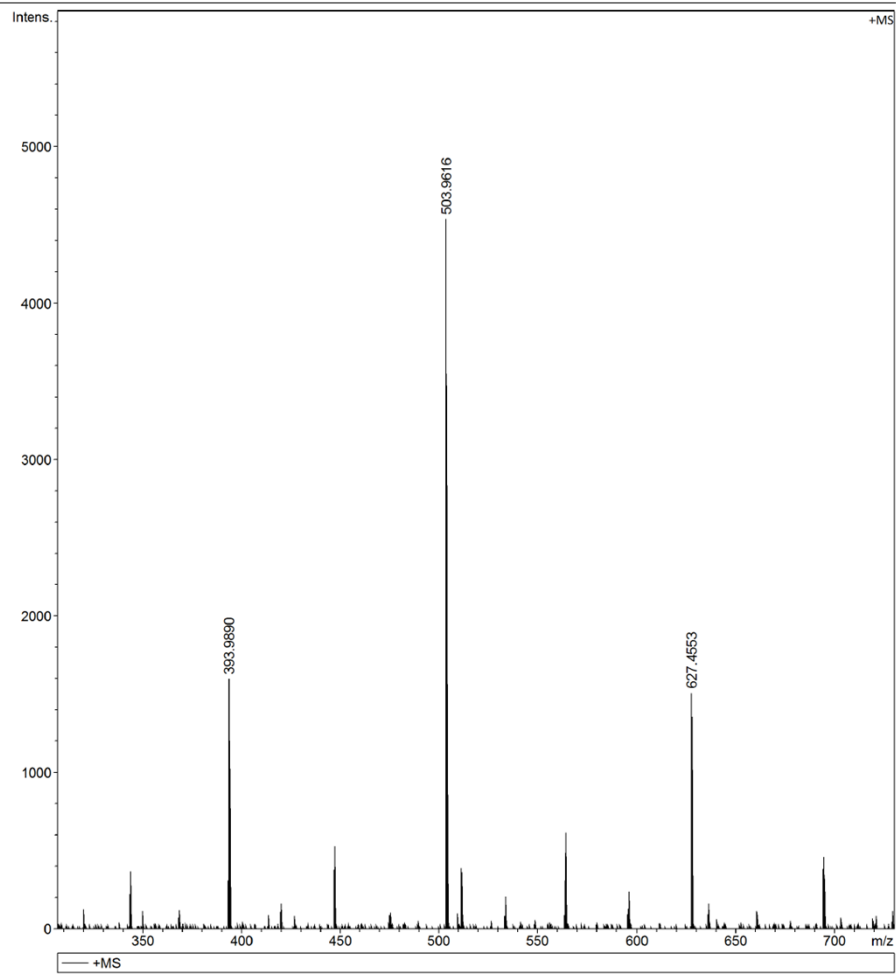

Bruker Compass DataAnalysis 4.1 printed: 3/3/2014 4:12:15 PM by: BDAL@DE Page 1 of 1

**Figure S6.** ESI-MS spectra of  $L2-Zn^{2+}$ .

Figure S7

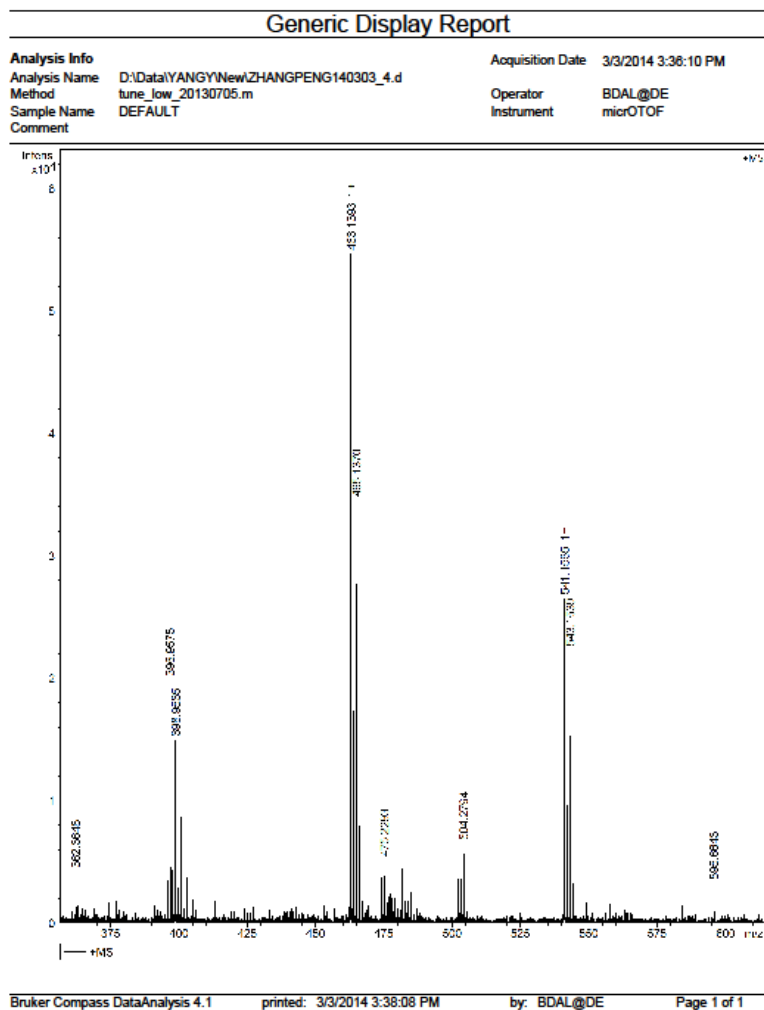

**Figure S7.** ESI-MS spectra of **L2-Zn<sup>2+</sup>** upon addition of **Cu<sup>2+</sup>**.

Figure S8



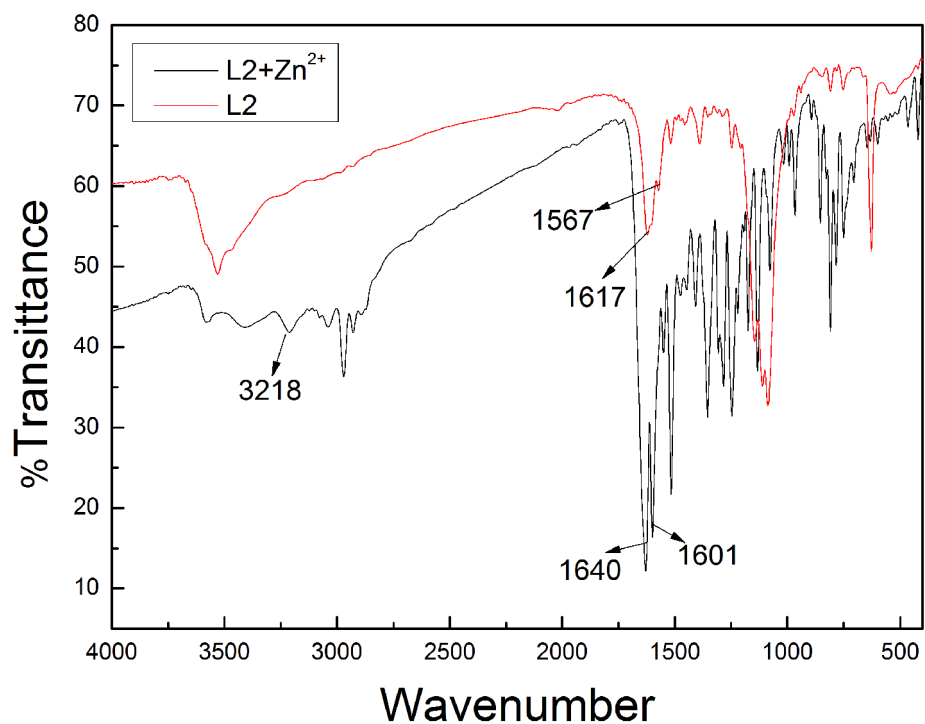

**Figure S8.** FT-IR spectra of L2 (the black line) and L2-Zn<sup>2+</sup> (the red line).

Figure S9

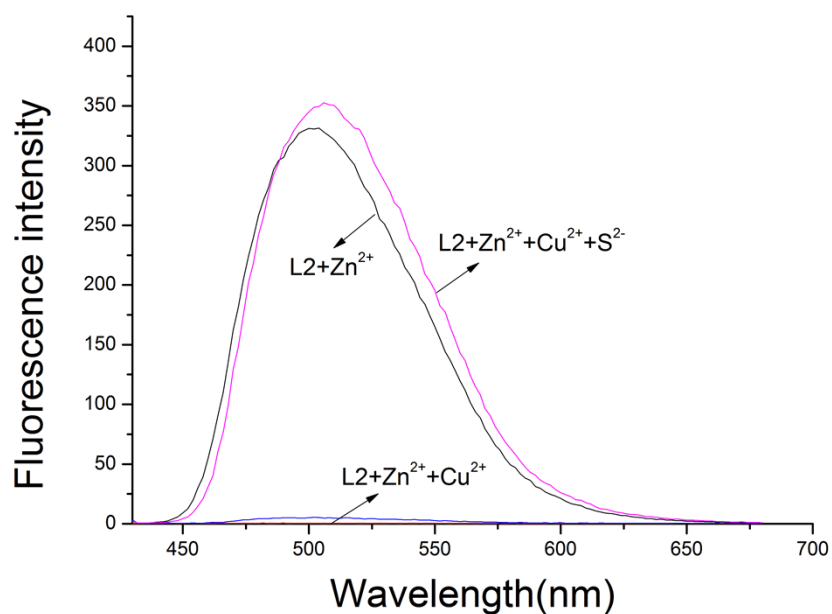

**Figure S9.** Fluorescence spectra of L2-Zn<sup>2+</sup> (20  $\mu$ M) in the presence of Cu<sup>2+</sup> or Cu<sup>2+</sup> and S<sup>2-</sup> in DMSO/H<sub>2</sub>O (8:2, v/v, containing 0.01 M HEPES, pH=7.24), ( $\lambda_{ex}$ =423 nm).

Figure S10

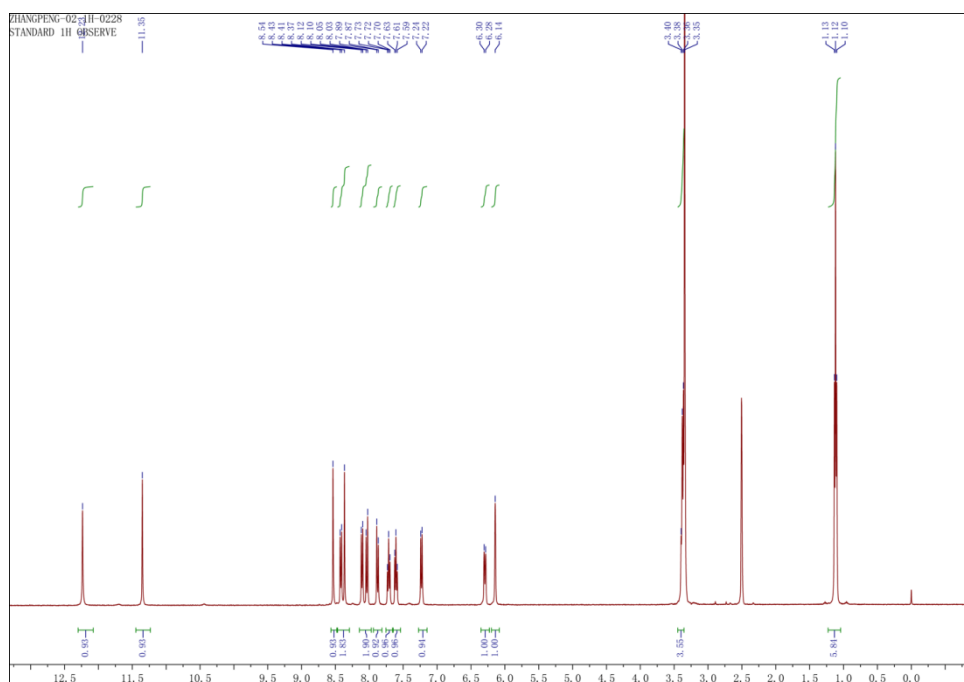

Figure S10.  $^1\text{H}$  NMR spectra of L2.

Figure S11

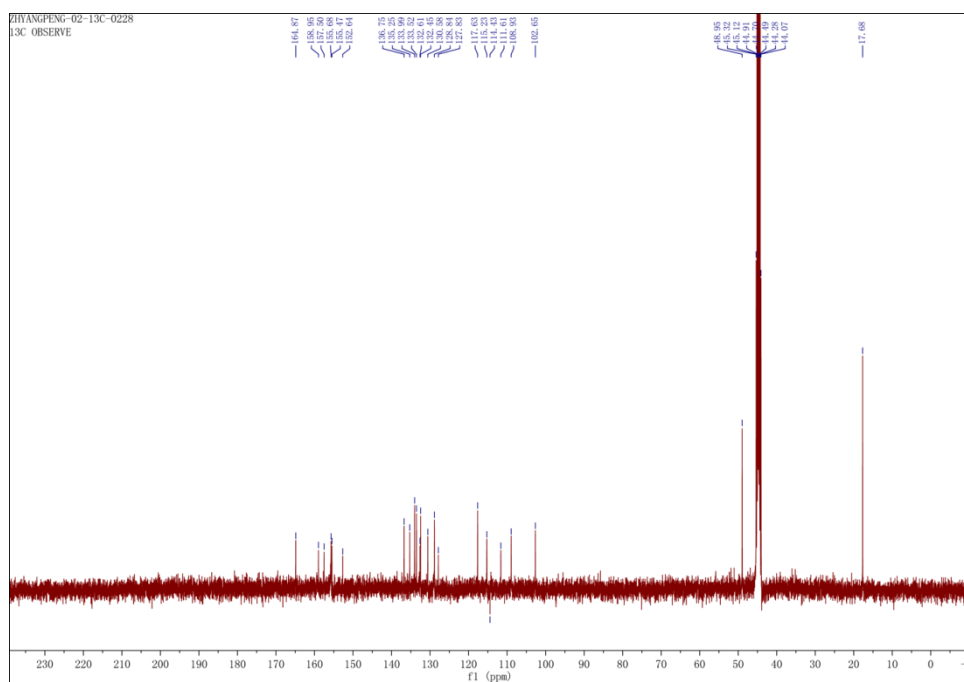

Figure S11.  $^{13}\text{C}$  NMR spectra of L2.
